# Supplementary material for: Transcriptional analyses provide new insight into the late-stage immune response of a diseased Caribbean coral
Source: PubMed Central journal article supplement (PMC5990752; doi:10.1098/rsos.172062), 2018-05-16

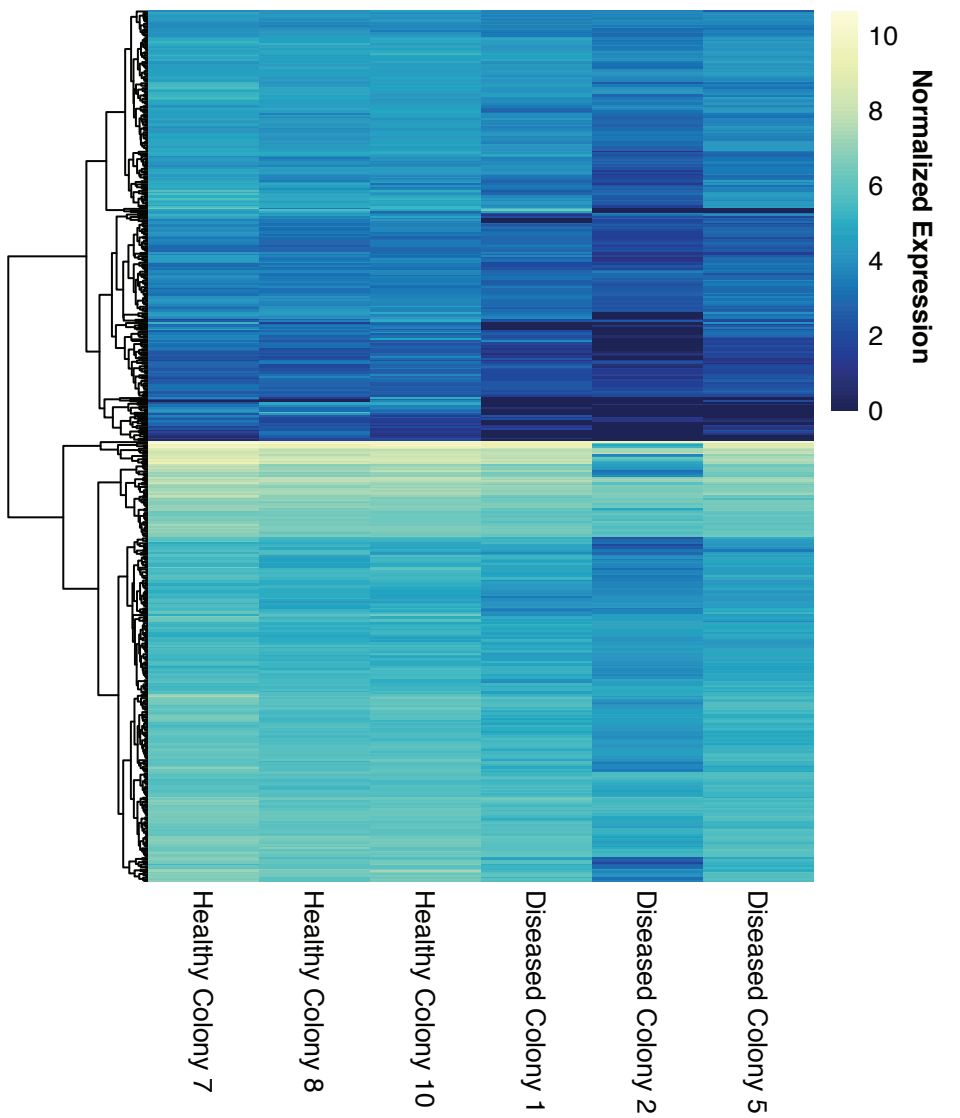

Supplement: rsos172062supp6.pdf [file rsos172062supp6.pdf]
